# Supplementary material for: Antitumor effects of metformin via indirect inhibition of protein phosphatase 2A in patients with endometrial cancer
Source: PubMed Central journal article supplement (PMC5812621; doi:10.1371/journal.pone.0192759), 2018-02-14
Supplement: pone.0192759.s004.pdf [file pone.0192759.s004.pdf]

```

GET
FILE=' /Users/antira/Desktop/PP2A /pp2a figure/FIG2 C.sav .
DATASET NAME $DataSet WINDOW=FRONT.
T-TEST
 /TESTVAL=0
 /MISSING=ANALYSIS
 /VARIABLES=pre post
 /CRITERIA=CI(.95).

```

## T-Test

### Notes

|                        |                                |                                                                                                                            |
|------------------------|--------------------------------|----------------------------------------------------------------------------------------------------------------------------|
| Output Created         |                                | 21-JUN-2017 21:04:14                                                                                                       |
| Comments               |                                |                                                                                                                            |
| Input                  | Data                           | /Users/antira/Desktop/PP2A /pp2a figure/FIG2 C.sav                                                                         |
|                        | Active Dataset                 | \$DataSet                                                                                                                  |
|                        | Filter                         | <none>                                                                                                                     |
|                        | Weight                         | <none>                                                                                                                     |
|                        | Split File                     | <none>                                                                                                                     |
|                        | N of Rows in Working Data File | 27                                                                                                                         |
| Missing Value Handling | Definition of Missing          | User defined missing values are treated as missing.                                                                        |
|                        | Cases Used                     | Statistics for each analysis are based on the cases with no missing or out-of-range data for any variable in the analysis. |
| Syntax                 |                                | T-TEST<br>/TESTVAL=0<br>/MISSING=ANALYSIS<br>/VARIABLES=pre post<br>/CRITERIA=CI(.95).                                     |
| Resources              | Processor Time                 | 00:00:00.00                                                                                                                |
|                        | Elapsed Time                   | 00:00:00.00                                                                                                                |

[\$DataSet] /Users/antira/Desktop/PP2A /pp2a figure/FIG2 C.sav

### One-Sample Statistics

|      | N  | Mean    | Std. Deviation | Std. Error Mean |
|------|----|---------|----------------|-----------------|
| pre  | 27 | 10.2222 | 2.02548        | .38980          |
| post | 27 | 5.0741  | 3.17352        | .61074          |

### One-Sample Test

|      | Test Value = 0 |    |                 |                 |                                           |         |
|------|----------------|----|-----------------|-----------------|-------------------------------------------|---------|
|      | t              | df | Sig. (2-tailed) | Mean Difference | 95% Confidence Interval of the Difference |         |
|      |                |    |                 |                 | Lower                                     | Upper   |
| pre  | 26.224         | 26 | .000            | 10.22222        | 9.4210                                    | 11.0235 |
| post | 8.308          | 26 | .000            | 5.07407         | 3.8187                                    | 6.3295  |

**SUMMARIZE**

```

/TABLES=pre post
/FORMAT=VALIDLIST NOCASENUM TOTAL LIMIT=100
/TITLE=' Case Summaries'
/MISSING=VARIABLE
/CELLS=COUNT.
    
```

## Summarize

### Notes

|                        |                                |                                                                                                                                                |
|------------------------|--------------------------------|------------------------------------------------------------------------------------------------------------------------------------------------|
| Output Created         |                                | 21-JUN-2017 21:04:38                                                                                                                           |
| Comments               |                                |                                                                                                                                                |
| Input                  | Data                           | /Users/antira/Desktop/PP2A /pp2a figure/FIG2 C.sav                                                                                             |
|                        | Active Dataset                 | \$DataSet                                                                                                                                      |
|                        | Filter                         | <none>                                                                                                                                         |
|                        | Weight                         | <none>                                                                                                                                         |
|                        | Split File                     | <none>                                                                                                                                         |
|                        | N of Rows in Working Data File | 27                                                                                                                                             |
| Missing Value Handling | Definition of Missing          | For each dependent variable in a table, user-defined missing values for the dependent and all grouping variables are treated as missing.       |
|                        | Cases Used                     | Cases used for each table have no missing values in any independent variable, and not all dependent variables have missing values.             |
| Syntax                 |                                | SUMMARIZE<br>/TABLES=pre post<br>/FORMAT=VALIDLIST NOCASENUM TOTAL LIMIT=100<br>/TITLE=' Case Summaries'<br>/MISSING=VARIABLE<br>/CELLS=COUNT. |
| Resources              | Processor Time                 | 00:00:00.00                                                                                                                                    |
|                        | Elapsed Time                   | 00:00:00.00                                                                                                                                    |

**Case Processing Summary<sup>a</sup>**

|      | Cases    |         |          |         |       |         |
|------|----------|---------|----------|---------|-------|---------|
|      | Included |         | Excluded |         | Total |         |
|      | N        | Percent | N        | Percent | N     | Percent |
| pre  | 27       | 100.0%  | 0        | 0.0%    | 27    | 100.0%  |
| post | 27       | 100.0%  | 0        | 0.0%    | 27    | 100.0%  |

a. Limited to first 100 cases.

**Case Summaries<sup>a</sup>**

|         | pre   | post  |
|---------|-------|-------|
| 1       | 8.00  | 3.00  |
| 2       | 12.00 | .00   |
| 3       | 8.00  | .00   |
| 4       | 8.00  | 4.00  |
| 5       | 12.00 | 12.00 |
| 6       | 8.00  | 4.00  |
| 7       | 8.00  | 8.00  |
| 8       | 8.00  | 4.00  |
| 9       | 12.00 | 8.00  |
| 10      | 12.00 | 4.00  |
| 11      | 12.00 | 8.00  |
| 12      | 12.00 | 8.00  |
| 13      | 8.00  | 8.00  |
| 14      | 12.00 | 8.00  |
| 15      | 8.00  | 8.00  |
| 16      | 12.00 | 8.00  |
| 17      | 12.00 | 4.00  |
| 18      | 12.00 | 4.00  |
| 19      | 12.00 | 4.00  |
| 20      | 8.00  | .00   |
| 21      | 8.00  | 2.00  |
| 22      | 12.00 | 4.00  |
| 23      | 12.00 | 8.00  |
| 24      | 8.00  | 8.00  |
| 25      | 12.00 | .00   |
| 26      | 8.00  | 4.00  |
| 27      | 12.00 | 4.00  |
| Total N | 27    | 27    |

a. Limited to first 100 cases.

\*NonparametricTests Related Samples  
 NPTESTS  
 /RELATED TEST(pre post) WILCOXON  
 /MISSING SCOPE=ANALYSIS USERMISSING=EXCLUDE  
 /CRITERIA ALPHA=0.05 CILEVEL=95.

## Nonparametric Tests

### Notes

|                |                                                                                                                                      |                                                    |
|----------------|--------------------------------------------------------------------------------------------------------------------------------------|----------------------------------------------------|
| Output Created | 21-JUN-2017 21:05:12                                                                                                                 |                                                    |
| Comments       |                                                                                                                                      |                                                    |
| Input          | Data                                                                                                                                 | /Users/antira/Desktop/PP2A /pp2a figure/FIG2 C.sav |
|                | Active Dataset                                                                                                                       | \$DataSet                                          |
|                | Filter                                                                                                                               | <none>                                             |
|                | Weight                                                                                                                               | <none>                                             |
|                | Split File                                                                                                                           | <none>                                             |
|                | N of Rows in Working Data File                                                                                                       | 27                                                 |
| Syntax         | NPTESTS<br>/RELATED TEST(pre post) WILCOXON<br>/MISSING<br>SCOPE=ANALYSIS<br>USERMISSING=EXCLUDE<br>/CRITERIA ALPHA=0.05 CILEVEL=95. |                                                    |
| Resources      | Processor Time                                                                                                                       | 00:00:00.50                                        |
|                | Elapsed Time                                                                                                                         | 00:00:00.00                                        |

### Hypothesis Test Summary

|   | Null Hypothesis                                          | Test                                      | Sig. | Decision                    |
|---|----------------------------------------------------------|-------------------------------------------|------|-----------------------------|
| 1 | The median of differences between pre and post equals 0. | Related-Samples Wilcoxon Signed Rank Test | .000 | Reject the null hypothesis. |

Asymptotic significances are displayed. The significance level is .05.
