# Supplementary material for: Antitumor effects of metformin via indirect inhibition of protein phosphatase 2A in patients with endometrial cancer
Source: PubMed Central journal article supplement (PMC5812621; doi:10.1371/journal.pone.0192759), 2018-02-14
Supplement: pone.0192759.s005.pdf [file pone.0192759.s005.pdf]

```

SUMMARIZE
  /TABLES=pre post
  /FORMAT=VALIDLIST NOCASENUM TOTAL LIMIT=100
  /TITLE=' Case Summaries'
  /MISSING=VARIABLE
  /CELLS=COUNT.

```

## Summarize

### Notes

|                        |                                |                                                                                                                                               |
|------------------------|--------------------------------|-----------------------------------------------------------------------------------------------------------------------------------------------|
| Output Created         |                                | 21-JUN-2017 21:31:28                                                                                                                          |
| Comments               |                                |                                                                                                                                               |
| Input                  | Data                           | /Users/antira/Desktop/PP2A /pp2a figure/FIG 3.sav                                                                                             |
|                        | Active Dataset                 | \$DataSet                                                                                                                                     |
|                        | Filter                         | <none>                                                                                                                                        |
|                        | Weight                         | <none>                                                                                                                                        |
|                        | Split File                     | <none>                                                                                                                                        |
|                        | N of Rows in Working Data File | 6                                                                                                                                             |
| Missing Value Handling | Definition of Missing          | For each dependent variable in a table, user-defined missing values for the dependent and all grouping variables are treated as missing.      |
|                        | Cases Used                     | Cases used for each table have no missing values in any independent variable, and not all dependent variables have missing values.            |
| Syntax                 |                                | SUMMARIZE<br>/TABLES=pre post<br>/FORMAT=VALIDLIST NOCASENUM TOTAL LIMIT=100<br>/TITLE='Case Summaries'<br>/MISSING=VARIABLE<br>/CELLS=COUNT. |
| Resources              | Processor Time                 | 00:00:00.01                                                                                                                                   |
|                        | Elapsed Time                   | 00:00:00.00                                                                                                                                   |

### Case Processing Summary<sup>a</sup>

|      | Cases    |         |          |         |       |         |
|------|----------|---------|----------|---------|-------|---------|
|      | Included |         | Excluded |         | Total |         |
|      | N        | Percent | N        | Percent | N     | Percent |
| pre  | 6        | 100.0%  | 0        | 0.0%    | 6     | 100.0%  |
| post | 6        | 100.0%  | 0        | 0.0%    | 6     | 100.0%  |

a. Limited to first 100 cases.

### Case Summaries<sup>a</sup>

|         | pre    | post   |
|---------|--------|--------|
| 1       | 1.2079 | 1.1749 |
| 2       | 3.6999 | 1.4717 |
| 3       | 2.1924 | 1.3310 |
| 4       | 3.2546 | 2.2230 |
| 5       | 2.9130 | 1.5236 |
| 6       | 1.1547 | 1.0849 |
| Total N | 6      | 6      |

a. Limited to first 100 cases.

\*Nonparametric Tests Related Samples  
 NPTESTS  
 /RELATED TEST(pre post) WILCOXON  
 /MISSING SCOPE=ANALYSIS USERMISSING=EXCLUDE  
 /CRITERIA ALPHA=0.05 CILEVEL=95.

## Nonparametric Tests

### Notes

|                |                                                                                                                                      |                                                   |
|----------------|--------------------------------------------------------------------------------------------------------------------------------------|---------------------------------------------------|
| Output Created | 21-JUN-2017 21:32:07                                                                                                                 |                                                   |
| Comments       |                                                                                                                                      |                                                   |
| Input          | Data                                                                                                                                 | /Users/antira/Desktop/PP2A /pp2a figure/FIG 3.sav |
|                | Active Dataset                                                                                                                       | \$DataSet                                         |
|                | Filter                                                                                                                               | <none>                                            |
|                | Weight                                                                                                                               | <none>                                            |
|                | Split File                                                                                                                           | <none>                                            |
|                | N of Rows in Working Data File                                                                                                       | 6                                                 |
| Syntax         | NPTESTS<br>/RELATED TEST(pre post) WILCOXON<br>/MISSING<br>SCOPE=ANALYSIS<br>USERMISSING=EXCLUDE<br>/CRITERIA ALPHA=0.05 CILEVEL=95. |                                                   |
| Resources      | Processor Time                                                                                                                       | 00:00:00.43                                       |
|                | Elapsed Time                                                                                                                         | 00:00:00.00                                       |

### Hypothesis Test Summary

|   | Null Hypothesis                                          | Test                                      | Sig. | Decision                    |
|---|----------------------------------------------------------|-------------------------------------------|------|-----------------------------|
| 1 | The median of differences between pre and post equals 0. | Related-Samples Wilcoxon Signed Rank Test | .028 | Reject the null hypothesis. |

Asymptotic significances are displayed. The significance level is .05.

T-TEST  
 /TESTVAL=0  
 /MISSING=ANALYSIS  
 /VARIABLES=decreaserate  
 /CRITERIA=C I(.95).

### T-Test

**Notes**

|                        |                                                                                                |                                                                                                                            |
|------------------------|------------------------------------------------------------------------------------------------|----------------------------------------------------------------------------------------------------------------------------|
| Output Created         | 21-JUN-2017 21:32:31                                                                           |                                                                                                                            |
| Comments               |                                                                                                |                                                                                                                            |
| Input                  | Data                                                                                           | /Users/antira/Desktop/PP2A /pp2a figure/FIG 3.sav                                                                          |
|                        | Active Dataset                                                                                 | \$DataSet                                                                                                                  |
|                        | Filter                                                                                         | <none>                                                                                                                     |
|                        | Weight                                                                                         | <none>                                                                                                                     |
|                        | Split File                                                                                     | <none>                                                                                                                     |
|                        | N of Rows in Working Data File                                                                 | 6                                                                                                                          |
| Missing Value Handling | Definition of Missing                                                                          | User defined missing values are treated as missing.                                                                        |
|                        | Cases Used                                                                                     | Statistics for each analysis are based on the cases with no missing or out-of-range data for any variable in the analysis. |
| Syntax                 | T-TEST<br>/TESTVAL=0<br>/MISSING=ANALYSIS<br><br>/VARIABLES=decreaserate<br>/CRITERIA=CI(.95). |                                                                                                                            |
| Resources              | Processor Time                                                                                 | 00:00:00.01                                                                                                                |
|                        | Elapsed Time                                                                                   | 00:00:00.00                                                                                                                |

**One-Sample Statistics**

|              | N | Mean      | Std. Deviation | Std. Error Mean |
|--------------|---|-----------|----------------|-----------------|
| decreaserate | 6 | 31.277000 | 22.9049591     | 9.3509104       |

**One-Sample Test**

|              | Test Value = 0 |    |                 |                 |                                           |           |
|--------------|----------------|----|-----------------|-----------------|-------------------------------------------|-----------|
|              | t              | df | Sig. (2-tailed) | Mean Difference | 95% Confidence Interval of the Difference |           |
|              |                |    |                 |                 | Lower                                     | Upper     |
| decreaserate | 3.345          | 5  | .020            | 31.2770000      | 7.239720                                  | 55.314280 |
