# Supplementary material for: Antitumor effects of metformin via indirect inhibition of protein phosphatase 2A in patients with endometrial cancer
Source: PubMed Central journal article supplement (PMC5812621; doi:10.1371/journal.pone.0192759), 2018-02-14
Supplement: pone.0192759.s007.pdf [file pone.0192759.s007.pdf]

GET

FILE=' /Users/antira/Desktop/PP2A /pp2a figure/FIG 5b HEC IB wst.sav'.  
DATASET NAME \$DataSet WINDOW=FRONT.

## Dataset Name

### Notes

|                |                                            |                                                               |
|----------------|--------------------------------------------|---------------------------------------------------------------|
| Output Created | 22-JUN-2017 09:59:16                       |                                                               |
| Comments       |                                            |                                                               |
| Input          | Data                                       | /Users/antira/Desktop/PP2A /pp2a figure/FIG 5b HEC IB wst.sav |
|                | Filter                                     | <none>                                                        |
|                | Weight                                     | <none>                                                        |
|                | Split File                                 | <none>                                                        |
| Syntax         | DATASET NAME<br>\$DataSet<br>WINDOW=FRONT. |                                                               |
| Resources      | Processor Time                             | 00:00:00.00                                                   |
|                | Elapsed Time                               | 00:00:00.00                                                   |

### Warnings

The active dataset will replace the existing dataset named \$DataSet.

SUMMARIZE

/TABLES=wst BY sirna  
/FORMAT=VALIDLIST NOCASENUM TOTAL LIMIT=100  
/TITLE=' Case Summaries'  
/MISSING=VARIABLE  
/CELLS=COUNT.

## Summarize

**Notes**

|                        |                                |                                                                                                                                                         |
|------------------------|--------------------------------|---------------------------------------------------------------------------------------------------------------------------------------------------------|
| Output Created         |                                | 22-JUN-2017 09:59:46                                                                                                                                    |
| Comments               |                                |                                                                                                                                                         |
| Input                  | Data                           | /Users/antira/Desktop/PP2A /pp2a figure/FIG 5b HEC IB wst.sav                                                                                           |
|                        | Active Dataset                 | \$DataSet                                                                                                                                               |
|                        | Filter                         | <none>                                                                                                                                                  |
|                        | Weight                         | <none>                                                                                                                                                  |
|                        | Split File                     | <none>                                                                                                                                                  |
|                        | N of Rows in Working Data File | 42                                                                                                                                                      |
| Missing Value Handling | Definition of Missing          | For each dependent variable in a table, user-defined missing values for the dependent and all grouping variables are treated as missing.                |
|                        | Cases Used                     | Cases used for each table have no missing values in any independent variable, and not all dependent variables have missing values.                      |
| Syntax                 |                                | SUMMARIZE<br>/TABLES=wst BY sirna<br>/FORMAT=VALIDLIST<br>NOCASENUM TOTAL<br>LIMIT=100<br>/TITLE='Case Summaries'<br>/MISSING=VARIABLE<br>/CELLS=COUNT. |
| Resources              | Processor Time                 | 00:00:00.01                                                                                                                                             |
|                        | Elapsed Time                   | 00:00:00.00                                                                                                                                             |

[\$DataSet] /Users/antira/Desktop/PP2A /pp2a figure/FIG 5b HEC IB wst.sav

**Case Processing Summary<sup>a</sup>**

|             | Cases    |         |          |         |       |         |
|-------------|----------|---------|----------|---------|-------|---------|
|             | Included |         | Excluded |         | Total |         |
|             | N        | Percent | N        | Percent | N     | Percent |
| wst * sirna | 42       | 100.0%  | 0        | 0.0%    | 42    | 100.0%  |

a. Limited to first 100 cases.

Case Summaries<sup>a</sup>

|       |          |    | wst  |
|-------|----------|----|------|
| sirna | nontarge | 1  | .99  |
|       |          | 2  | 1.08 |
|       |          | 3  | 1.08 |
|       |          | 4  | .97  |
|       |          | 5  | .97  |
|       |          | 6  | 1.00 |
|       |          | 7  | .88  |
|       |          | 8  | 1.08 |
|       |          | 9  | .91  |
|       |          | 10 | 1.08 |
|       |          | 11 | 1.15 |
|       |          | 12 | 1.19 |
|       |          | 13 | 1.15 |
|       |          | 14 | 1.04 |
|       |          | 15 | 1.11 |
|       |          | 16 | 1.09 |
|       |          | 17 | .69  |
|       |          | 18 | .66  |
|       |          | 19 | .70  |
|       |          | 20 | .55  |
|       |          | 21 | .64  |
|       | Total    | N  | 21   |
| pp2a  |          | 1  | .86  |
|       |          | 2  | .84  |
|       |          | 3  | .86  |
|       |          | 4  | .87  |
|       |          | 5  | .84  |
|       |          | 6  | .81  |
|       |          | 7  | .74  |
|       |          | 8  | .76  |
|       |          | 9  | .75  |
|       |          | 10 | .86  |
|       |          | 11 | .97  |
|       |          | 12 | .89  |
|       |          | 13 | .95  |
|       |          | 14 | .91  |
|       |          | 15 | .95  |
|       |          | 16 | .91  |
|       |          | 17 | .56  |
|       |          | 18 | .50  |
|       |          | 19 | .60  |
|       |          | 20 | .59  |
|       |          | 21 | .56  |
|       | Total    | N  | 21   |
| Total |          | N  | 42   |

a. Limited to first 100 cases.

```
T-TEST GROUPS=sirna('nontarget' 'pp2a')
/MISSING=ANALYSIS
/VARIABLES=wst
/CRITERIA=CI(.95).
```

## T-Test

### Notes

|                        |                                                                                              |                                                                                                                            |
|------------------------|----------------------------------------------------------------------------------------------|----------------------------------------------------------------------------------------------------------------------------|
| Output Created         | 22-JUN-2017 10:00:05                                                                         |                                                                                                                            |
| Comments               |                                                                                              |                                                                                                                            |
| Input                  | Data                                                                                         | /Users/antira/Desktop/PP2A /pp2a figure/FIG 5b HEC IB wst.sav                                                              |
|                        | Active Dataset                                                                               | \$DataSet                                                                                                                  |
|                        | Filter                                                                                       | <none>                                                                                                                     |
|                        | Weight                                                                                       | <none>                                                                                                                     |
|                        | Split File                                                                                   | <none>                                                                                                                     |
|                        | N of Rows in Working Data File                                                               | 42                                                                                                                         |
| Missing Value Handling | Definition of Missing                                                                        | User defined missing values are treated as missing.                                                                        |
|                        | Cases Used                                                                                   | Statistics for each analysis are based on the cases with no missing or out-of-range data for any variable in the analysis. |
| Syntax                 | T-TEST GROUPS=sirna ('nontarget' 'pp2a') /MISSING=ANALYSIS /VARIABLES=wst /CRITERIA=CI(.95). |                                                                                                                            |
| Resources              | Processor Time                                                                               | 00:00:00.00                                                                                                                |
|                        | Elapsed Time                                                                                 | 00:00:00.00                                                                                                                |

### Group Statistics

| sirna |          | N  | Mean  | Std. Deviation | Std. Error Mean |
|-------|----------|----|-------|----------------|-----------------|
| wst   | nontarge | 21 | .9533 | .19175         | .04184          |
|       | pp2a     | 21 | .7897 | .14474         | .03159          |

### Independent Samples Test

|     |                             | Levene's Test for Equality of Variances |      | t-test for Equality of Means |        |                 |                 |                       |                                           |        |
|-----|-----------------------------|-----------------------------------------|------|------------------------------|--------|-----------------|-----------------|-----------------------|-------------------------------------------|--------|
|     |                             | F                                       | Sig. | t                            | df     | Sig. (2-tailed) | Mean Difference | Std. Error Difference | 95% Confidence Interval of the Difference |        |
|     |                             |                                         |      |                              |        |                 |                 |                       | Lower                                     | Upper  |
| wst | Equal variances assumed     | 1.616                                   | .211 | 3.121                        | 40     | .003            | .16361          | .05243                | .05766                                    | .26957 |
|     | Equal variances not assumed |                                         |      | 3.121                        | 37.206 | .003            | .16361          | .05243                | .05741                                    | .26982 |

\*Nonparametric Tests Independent Samples

NPTESTS

/INDEPENDENT TEST (wst) GROUP (sirna) MANN\_WHITNEY  
 /MISSING SCOPE=ANALYSIS USERMISSING=EXCLUDE  
 /CRITERIA ALPHA=0.05 CILEVEL=95.

## Nonparametric Tests

### Notes

|                |                                                                                                                                                  |                                                               |
|----------------|--------------------------------------------------------------------------------------------------------------------------------------------------|---------------------------------------------------------------|
| Output Created | 22-JUN-2017 10:00:23                                                                                                                             |                                                               |
| Comments       |                                                                                                                                                  |                                                               |
| Input          | Data                                                                                                                                             | /Users/antira/Desktop/PP2A /pp2a figure/FIG 5b HEC IB wst.sav |
|                | Active Dataset                                                                                                                                   | \$DataSet                                                     |
|                | Filter                                                                                                                                           | <none>                                                        |
|                | Weight                                                                                                                                           | <none>                                                        |
|                | Split File                                                                                                                                       | <none>                                                        |
|                | N of Rows in Working Data File                                                                                                                   | 42                                                            |
| Syntax         | NPTESTS<br>/INDEPENDENT TEST (wst) GROUP (sirna) MANN_WHITNEY<br>/MISSING SCOPE=ANALYSIS USERMISSING=EXCLUDE<br>/CRITERIA ALPHA=0.05 CILEVEL=95. |                                                               |
| Resources      | Processor Time                                                                                                                                   | 00:00:00.25                                                   |
|                | Elapsed Time                                                                                                                                     | 00:00:00.00                                                   |

### Hypothesis Test Summary

|   | Null Hypothesis                                                 | Test                                    | Sig. | Decision                    |
|---|-----------------------------------------------------------------|-----------------------------------------|------|-----------------------------|
| 1 | The distribution of wst is the same across categories of sirna. | Independent-Samples Mann-Whitney U Test | .002 | Reject the null hypothesis. |

Asymptotic significances are displayed. The significance level is .05.
