# Supplementary material for: Antitumor effects of metformin via indirect inhibition of protein phosphatase 2A in patients with endometrial cancer
Source: PubMed Central journal article supplement (PMC5812621; doi:10.1371/journal.pone.0192759), 2018-02-14
Supplement: pone.0192759.s008.pdf [file pone.0192759.s008.pdf]

```

SUMMARIZE
  /TABLES=caspase BY sirna
  /FORMAT=VALIDLIST NOCASENUM TOTAL LIMIT=100
  /TITLE=' Case Summaries
  /MISSING=VARIABLE
  /CELLS=COUNT.

```

## Summarize

### Notes

|                |                                |                                                                    |
|----------------|--------------------------------|--------------------------------------------------------------------|
| Output Created | 22-JUN-2017 09:50:51           |                                                                    |
| Comments       |                                |                                                                    |
| Input          | Data                           | /Users/antira/Desktop/PP2A /pp2a figure/FIG 5c HEC 265 caspase.sav |
|                | Active Dataset                 | \$DataSet                                                          |
|                | Filter                         | <none>                                                             |
|                | Weight                         | <none>                                                             |
|                | Split File                     | <none>                                                             |
|                | N of Rows in Working Data File | 19                                                                 |

**Notes**

|                        |                       |                                                                                                                                                             |
|------------------------|-----------------------|-------------------------------------------------------------------------------------------------------------------------------------------------------------|
| Missing Value Handling | Definition of Missing | For each dependent variable in a table, user-defined missing values for the dependent and all grouping variables are treated as missing.                    |
|                        | Cases Used            | Cases used for each table have no missing values in any independent variable, and not all dependent variables have missing values.                          |
| Syntax                 |                       | SUMMARIZE<br>/TABLES=caspase BY sirna<br>/FORMAT=VALIDLIST<br>NOCASENUM TOTAL<br>LIMIT=100<br>/TITLE='Case Summaries'<br>/MISSING=VARIABLE<br>/CELLS=COUNT. |
| Resources              | Processor Time        | 00:00:00.01                                                                                                                                                 |
|                        | Elapsed Time          | 00:00:00.00                                                                                                                                                 |

[\$DataSet] /Users/antira/Desktop/PP2A /pp2a figure/FIG 5c HEC 265 caspase.sav

**Case Processing Summary<sup>a</sup>**

|                 | Cases    |         |          |         |       |         |
|-----------------|----------|---------|----------|---------|-------|---------|
|                 | Included |         | Excluded |         | Total |         |
|                 | N        | Percent | N        | Percent | N     | Percent |
| caspase * sirna | 18       | 94.7%   | 1        | 5.3%    | 19    | 100.0%  |

a. Limited to first 100 cases.

Case Summaries<sup>a</sup>

|       |          |       | caspase   |
|-------|----------|-------|-----------|
| sirna | nontarge | 1     | 364632.90 |
|       |          | 2     | 308871.42 |
|       |          | 3     | 369101.05 |
|       |          | 4     | 466623.51 |
|       |          | 5     | 428045.96 |
|       |          | 6     | 391978.09 |
|       |          | 7     | 391715.17 |
|       |          | 8     | 395448.34 |
|       |          | 9     | 399472.81 |
|       |          | Total | N         |
| pp2a  |          | 1     | 560457.96 |
|       |          | 2     | 572889.67 |
|       |          | 3     | 640879.26 |
|       |          | 4     | 518935.46 |
|       |          | 5     | 544087.95 |
|       |          | 6     | 600940.18 |
|       |          | 7     | 576467.10 |
|       |          | 8     | 505371.42 |
|       |          | 9     | 518725.57 |
|       |          | Total | N         |
| Total |          | N     | 18        |

a. Limited to first 100 cases.

T-TEST GROUPS=sirna('nontarget ' pp2a')  
 /MISSING=ANALYSIS  
 /VARIABLES=caspase  
 /CRITERIA=C I(.95).

# T-Test

## Notes

|                        |                                |                                                                                                                            |
|------------------------|--------------------------------|----------------------------------------------------------------------------------------------------------------------------|
| Output Created         |                                | 22-JUN-2017 09:51:10                                                                                                       |
| Comments               |                                |                                                                                                                            |
| Input                  | Data                           | /Users/antira/Desktop/PP2A /pp2a figure/FIG 5c HEC 265 caspase.sav                                                         |
|                        | Active Dataset                 | \$DataSet                                                                                                                  |
|                        | Filter                         | <none>                                                                                                                     |
|                        | Weight                         | <none>                                                                                                                     |
|                        | Split File                     | <none>                                                                                                                     |
|                        | N of Rows in Working Data File | 19                                                                                                                         |
| Missing Value Handling | Definition of Missing          | User defined missing values are treated as missing.                                                                        |
|                        | Cases Used                     | Statistics for each analysis are based on the cases with no missing or out-of-range data for any variable in the analysis. |
| Syntax                 |                                | T-TEST GROUPS=sirna ('nontarget' 'pp2a') /MISSING=ANALYSIS /VARIABLES=caspase /CRITERIA=CI(.95).                           |
| Resources              | Processor Time                 | 00:00:00.00                                                                                                                |
|                        | Elapsed Time                   | 00:00:00.00                                                                                                                |

**Group Statistics**

| sirna   |          | N | Mean       | Std. Deviation | Std. Error Mean |
|---------|----------|---|------------|----------------|-----------------|
| caspase | nontarge | 9 | 390654.363 | 43449.9409     | 14483.3136      |
|         | pp2a     | 9 | 559861.619 | 43706.7631     | 14568.9210      |

**Independent Samples Test**

|         |                             | Levene's Test for Equality of Variances |      | t-test for Equality of Means |    |                 |                 |                       |                                           |            |
|---------|-----------------------------|-----------------------------------------|------|------------------------------|----|-----------------|-----------------|-----------------------|-------------------------------------------|------------|
|         |                             | F                                       | Sig. | t                            | df | Sig. (2-tailed) | Mean Difference | Std. Error Difference | 95% Confidence Interval of the Difference |            |
|         |                             |                                         |      |                              |    |                 |                 |                       | Lower                                     | Upper      |
| caspase | Equal variances assumed     | .15                                     | .71  | -8.2                         | 16 | .000            | -169207.3       | 20543.1               | -212756.7                                 | -125657.78 |
|         | Equal variances not assumed |                                         |      | -8.2                         | 16 | .000            | -169207.3       | 20543.1               | -212756.9                                 | -125657.66 |

\*Nonparametric Tests Independent Samples

NPTESTS

/INDEPENDENT TEST (caspase) GROUP (sirna)

/MISSING SCOPE=ANALYSIS USERMISSING=EXCLUDE

/CRITERIA ALPHA=0.05 CILEVEL=95.

**Nonparametric Tests**

**Notes**

|                |                                                                                                                                                      |                                                                               |
|----------------|------------------------------------------------------------------------------------------------------------------------------------------------------|-------------------------------------------------------------------------------|
| Output Created | 22-JUN-2017 09:51:33                                                                                                                                 |                                                                               |
| Comments       |                                                                                                                                                      |                                                                               |
| Input          | Data                                                                                                                                                 | /Users/antira/Desktop/<br>PP2A /pp2a figure/FIG<br>5c HEC 265 caspase.<br>sav |
|                | Active Dataset                                                                                                                                       | \$DataSet                                                                     |
|                | Filter                                                                                                                                               | <none>                                                                        |
|                | Weight                                                                                                                                               | <none>                                                                        |
|                | Split File                                                                                                                                           | <none>                                                                        |
|                | N of Rows in<br>Working Data File                                                                                                                    | 19                                                                            |
| Syntax         | NPTESTS<br>/INDEPENDENT TEST<br>(caspase) GROUP (sirna)<br>/MISSING<br>SCOPE=ANALYSIS<br>USERMISSING=EXCLUDE<br>/CRITERIA ALPHA=0.<br>05 CILEVEL=95. |                                                                               |
| Resources      | Processor Time                                                                                                                                       | 00:00:00.33                                                                   |
|                | Elapsed Time                                                                                                                                         | 00:00:00.00                                                                   |

### Hypothesis Test Summary

|   | Null Hypothesis                                                     | Test                                    | Sig. | Decision                    |
|---|---------------------------------------------------------------------|-----------------------------------------|------|-----------------------------|
| 1 | The distribution of caspase is the same across categories of sirna. | Independent-Samples Kruskal-Wallis Test | .000 | Reject the null hypothesis. |

Asymptotic significances are displayed. The significance level is .05.
