# Supplementary material for: Antitumor effects of metformin via indirect inhibition of protein phosphatase 2A in patients with endometrial cancer
Source: PubMed Central journal article supplement (PMC5812621; doi:10.1371/journal.pone.0192759), 2018-02-14
Supplement: pone.0192759.s009.pdf [file pone.0192759.s009.pdf]

DATASET ACTIVATE \$DataSet

SAVE OUTFILE=' /Users/antira/Desktop/PP2A /pp2a figure/FIG 5c HEC 265 caspase.sav  
/COMPRESSED

GET

FILE=' /Users/antira/Desktop/PP2A /pp2a figure/FIG 5c HEC IB caspase.sav.  
DATASET NAME \$DataSet WINDOW=FRONT.

## Dataset Name

### Notes

|                |                                            |                                                                          |
|----------------|--------------------------------------------|--------------------------------------------------------------------------|
| Output Created | 22-JUN-2017 09:55:42                       |                                                                          |
| Comments       |                                            |                                                                          |
| Input          | Data                                       | /Users/antira/Desktop/<br>PP2A /pp2a figure/FIG<br>5c HEC IB caspase.sav |
|                | Filter                                     | <none>                                                                   |
|                | Weight                                     | <none>                                                                   |
|                | Split File                                 | <none>                                                                   |
| Syntax         | DATASET NAME<br>\$DataSet<br>WINDOW=FRONT. |                                                                          |
| Resources      | Processor Time                             | 00:00:00.00                                                              |
|                | Elapsed Time                               | 00:00:00.00                                                              |

### Warnings

The active dataset will replace the existing dataset named \$DataSet.

SUMMARIZE

```

/TABLES=caspase BY sirna
/FORMAT=VALIDLIST NOCASENUM TOTAL LIMIT=100
/TITLE=' Case Summaries
/MISSING=VARIABLE
/CELLS=COUNT.

```

## Summarize

### Notes

|                        |                                |                                                                                                                                          |
|------------------------|--------------------------------|------------------------------------------------------------------------------------------------------------------------------------------|
| Output Created         |                                | 22-JUN-2017 09:56:22                                                                                                                     |
| Comments               |                                |                                                                                                                                          |
| Input                  | Data                           | /Users/antira/Desktop/PP2A /pp2a figure/FIG 5c HEC IB caspase.sav                                                                        |
|                        | Active Dataset                 | \$DataSet                                                                                                                                |
|                        | Filter                         | <none>                                                                                                                                   |
|                        | Weight                         | <none>                                                                                                                                   |
|                        | Split File                     | <none>                                                                                                                                   |
|                        | N of Rows in Working Data File | 19                                                                                                                                       |
| Missing Value Handling | Definition of Missing          | For each dependent variable in a table, user-defined missing values for the dependent and all grouping variables are treated as missing. |
|                        | Cases Used                     | Cases used for each table have no missing values in any independent variable, and not all dependent variables have missing values.       |

**Notes**

|           |                |                                                                                                                                                                   |
|-----------|----------------|-------------------------------------------------------------------------------------------------------------------------------------------------------------------|
| Syntax    |                | SUMMARIZE<br>/TABLES=caspase BY<br>sirna<br>/FORMAT=VALIDLIST<br>NOCASENUM TOTAL<br>LIMIT=100<br>/TITLE='Case<br>Summaries'<br>/MISSING=VARIABLE<br>/CELLS=COUNT. |
| Resources | Processor Time | 00:00:00.00                                                                                                                                                       |
|           | Elapsed Time   | 00:00:00.00                                                                                                                                                       |

[\$DataSet] /Users/antira/Desktop/PP2A /pp2a figure/FIG 5c HEC IB caspase.sav

**Case Processing Summary<sup>a</sup>**

|                 | Cases    |         |          |         |       |         |
|-----------------|----------|---------|----------|---------|-------|---------|
|                 | Included |         | Excluded |         | Total |         |
|                 | N        | Percent | N        | Percent | N     | Percent |
| caspase * sirna | 18       | 94.7%   | 1        | 5.3%    | 19    | 100.0%  |

a. Limited to first 100 cases.

Case Summaries<sup>a</sup>

|       |          |       | caspase  |
|-------|----------|-------|----------|
| sirna | nontarge | 1     | 54843.70 |
|       |          | 2     | 49507.32 |
|       |          | 3     | 45579.21 |
|       |          | 4     | 44457.17 |
|       |          | 5     | 36929.17 |
|       |          | 6     | 37869.93 |
|       |          | 7     | 40608.25 |
|       |          | 8     | 46864.41 |
|       |          | 9     | 46325.33 |
|       |          | Total | N        |
| pp2a  |          | 1     | 52346.14 |
|       |          | 2     | 59843.59 |
|       |          | 3     | 52448.39 |
|       |          | 4     | 41858.09 |
|       |          | 5     | 45472.62 |
|       |          | 6     | 52486.73 |
|       |          | 7     | 65665.63 |
|       |          | 8     | 54038.97 |
|       |          | 9     | 65850.37 |
|       |          | Total | N        |
| Total |          | N     | 18       |

a. Limited to first 100 cases.

```
T-TEST GROUPS=sirna('nontarget' 'pp2a')
/MISSING=ANALYSIS
/VARIABLES=caspase
/CRITERIA=C I(.95).
```

## T-Test

### Notes

|                        |                                |                                                                                                                            |
|------------------------|--------------------------------|----------------------------------------------------------------------------------------------------------------------------|
| Output Created         |                                | 22-JUN-2017 09:56:45                                                                                                       |
| Comments               |                                |                                                                                                                            |
| Input                  | Data                           | /Users/antira/Desktop/PP2A /pp2a figure/FIG 5c HEC IB caspase.sav                                                          |
|                        | Active Dataset                 | \$DataSet                                                                                                                  |
|                        | Filter                         | <none>                                                                                                                     |
|                        | Weight                         | <none>                                                                                                                     |
|                        | Split File                     | <none>                                                                                                                     |
|                        | N of Rows in Working Data File | 19                                                                                                                         |
| Missing Value Handling | Definition of Missing          | User defined missing values are treated as missing.                                                                        |
|                        | Cases Used                     | Statistics for each analysis are based on the cases with no missing or out-of-range data for any variable in the analysis. |
| Syntax                 |                                | T-TEST GROUPS=sirna ('nontarget' 'pp2a') /MISSING=ANALYSIS /VARIABLES=caspase /CRITERIA=CI(.95).                           |
| Resources              | Processor Time                 | 00:00:00.00                                                                                                                |
|                        | Elapsed Time                   | 00:00:00.00                                                                                                                |

**Group Statistics**

| sirna   |          | N | Mean       | Std. Deviation | Std. Error Mean |
|---------|----------|---|------------|----------------|-----------------|
| caspase | nontarge | 9 | 44776.0541 | 5677.69090     | 1892.56363      |
|         | pp2a     | 9 | 54445.6140 | 8188.82525     | 2729.60842      |

**Independent Samples Test**

|         |                             | Levene's Test for Equality of Variances |      | t-test for Equality of Means |        |                 |                 |                       |                                           |            |
|---------|-----------------------------|-----------------------------------------|------|------------------------------|--------|-----------------|-----------------|-----------------------|-------------------------------------------|------------|
|         |                             | F                                       | Sig. | t                            | df     | Sig. (2-tailed) | Mean Difference | Std. Error Difference | 95% Confidence Interval of the Difference |            |
|         |                             |                                         |      |                              |        |                 |                 |                       | Lower                                     | Upper      |
| caspase | Equal variances assumed     | .977                                    | .338 | -2.911                       | 16     | .010            | -9669.5599      | 3321.52965            | -16710.888                                | -2628.2316 |
|         | Equal variances not assumed |                                         |      | -2.911                       | 14.248 | .011            | -9669.5599      | 3321.52965            | -16781.926                                | -2557.1936 |

\*Nonparametric Tests Independent Samples

NPTESTS

/INDEPENDENT TEST (caspase) GROUP (sirna)

/MISSING SCOPE=ANALYSIS USERMISSING=EXCLUDE

/CRITERIA ALPHA=0.05 CILEVEL=95.

**Nonparametric Tests**

**Notes**

|                |                                                                                                                                                      |                                                                   |
|----------------|------------------------------------------------------------------------------------------------------------------------------------------------------|-------------------------------------------------------------------|
| Output Created | 22-JUN-2017 09:57:00                                                                                                                                 |                                                                   |
| Comments       |                                                                                                                                                      |                                                                   |
| Input          | Data                                                                                                                                                 | /Users/antira/Desktop/PP2A /pp2a figure/FIG 5c HEC IB caspase.sav |
|                | Active Dataset                                                                                                                                       | \$DataSet                                                         |
|                | Filter                                                                                                                                               | <none>                                                            |
|                | Weight                                                                                                                                               | <none>                                                            |
|                | Split File                                                                                                                                           | <none>                                                            |
|                | N of Rows in Working Data File                                                                                                                       | 19                                                                |
| Syntax         | NPTESTS<br>/INDEPENDENT TEST<br>(caspase) GROUP (sirna)<br>/MISSING<br>SCOPE=ANALYSIS<br>USERMISSING=EXCLUDE<br>/CRITERIA ALPHA=0.<br>05 CILEVEL=95. |                                                                   |
| Resources      | Processor Time                                                                                                                                       | 00:00:00.12                                                       |
|                | Elapsed Time                                                                                                                                         | 00:00:00.00                                                       |

### Hypothesis Test Summary

|   | Null Hypothesis                                                     | Test                                    | Sig. | Decision                    |
|---|---------------------------------------------------------------------|-----------------------------------------|------|-----------------------------|
| 1 | The distribution of caspase is the same across categories of sirna. | Independent-Samples Kruskal-Wallis Test | .024 | Reject the null hypothesis. |

Asymptotic significances are displayed. The significance level is .05.
